# Supplementary material
Source: Research Square preprint supplement (doi:10.21203/rs.3.rs-9753663/v1)
Supplement: Supplementary file 1 [file 66e784d44af1807e0e4dee22.docx]

Supplementary Table S1 Patient demographics and specimen sources of clinical isolates

| Clinical isolate ID | Patient age (years) | Patient sex | Specimen type | Clinical isolate ID | Patient age (years) | Patient sex | Specimen type |
| --- | --- | --- | --- | --- | --- | --- | --- |
| AF220 | 80 | Male | Sputum | AF261 | 76 | Male | Bronchoalveolar lavage fluid |
| AF221 | 57 | Male | Sputum | AF264 | 67 | Male | Bronchoalveolar lavage fluid |
| AF222 | 77 | Male | Sputum | AF266 | 72 | Male | Sputum |
| AF224 | 53 | Female | Sputum | AF268 | 86 | Male | Sputum |
| AF230 | 57 | Male | Sputum | AF271 | 76 | Male | Sputum |
| AF231 | 72 | Male | Sputum | AF273 | 74 | Male | Bronchoalveolar lavage fluid |
| AF234 | 67 | Male | Sputum | AF274 | 61 | Male | Sputum |
| AF235 | 55 | Male | Sputum | AF275 | 67 | Female | Sputum |
| AF248 | 83 | Male | Sputum | AF276 | 85 | Male | Sputum |
| AF249 | 86 | Female | Sputum | AF277 | 71 | Female | Sputum |
| AF253 | 68 | Male | Sputum | AF280 | 68 | Male | Sputum |

Supplementary Table S2 Primers used for PCR and RT–qPCR assays

| **Gene** | **Experiment** | **Forward Primer** | **Reverse Primer** |
| --- | --- | --- | --- |
| *cyp51A* | PCR | CTTTAGATTCGGTGGACGCA | GGAGACTAGCACAAAGGGCATA |
| *cyp51B* | PCR | GCGAGACACTCAGCCTACCTTTAT | GCAAGTCTATCAAGAAGAGGCATG |
| *hmg1* | PCR | GTGTCTCACCCCTGCTAACCTTCAA | AGGCTCGGCTACATTCCTCTCTTGG |
| *ITS* | PCR | TCCGTAGGTGAACCTGCGG | TCCTCCGCTTATTGATATGC |
| *Afu1g10910* | RT-qPCR | TTCCCAACAACATCCAGACC | CGACGGAACATAGCAGTGAA |
| *cyp51A* | RT-qPCR | TCCAAGCTGATGGAGCAGAA | GTGAATCGCGCAGATAGTCC |
| *cyp51B* | RT-qPCR | GCGGGTCAACATTCTTCCTC | GAGGCAAGTCAGATCCGAGA |
| *erg1* | RT-qPCR | CAAGCAACATCACCCGCATA | TTCGGGAATGTCAACGAGGA |
| *erg4* | RT-qPCR | CATGTGACGTGTTCTTCGCT | ACCCGACGCTCATATTCCAT |
| *erg24* | RT-qPCR | TTTAGCCCTGGGCACATACA | CTGGTGCCAATTCTCTCAGC |
| *hmg1* | RT-qPCR | ACCACCATCCTCTGCATCAA | ATTCGGTCAGAGGCCAATCA |
| *atrF* | RT-qPCR | AGTCCAGCTACACGGTTTCA | TGTCGAGGGATTCACCGTAG |
| *cdr1B* | RT-qPCR | GCCTCGACAGTCAAACTTCC | GTCGAATCGTTGGAACAGCA |
| *mdr1* | RT-qPCR | CCCTGAGCTTGGTTACATGC | GCTAATTGCCTTGGCGTACA |
| *mdr2* | RT-qPCR | ATTGGAGCCAAAGTCGAACG | CTCGATGTCCTCATGCTCCT |
| *mdr4* | RT-qPCR | GGTATCGTCTTCGGTGACCT | CACTCACCAAACACCAGCAA |
| *mdrA* | RT-qPCR | GTCCAAGTTCAAGCCAAGCA | GACGGGTAATTGGTCCAAGC |
| *mfsB* | RT-qPCR | TACCTGGCACTCATCAGCAA | TCGAACCGAGAACCTTGGAA |
